# Supplementary material for: Analysis of the adhesive secreting cells of Arion subfuscus: insights into the role of microgels in a tough, fast-setting hydrogel glue
Source: Royal Society of Chemistry journal article supplement (doi:10.1039/d4sm00071d), 2024-01-01
Supplement: d4sm00071d3.pdf [file d4sm00071d3.pdf]

## Supplemental Figures

Smith and Flammang, "Analysis of the adhesive secreting cells of *Arion subfuscus*: insights into the role of microgels in a tough, fast-setting hydrogel glue"

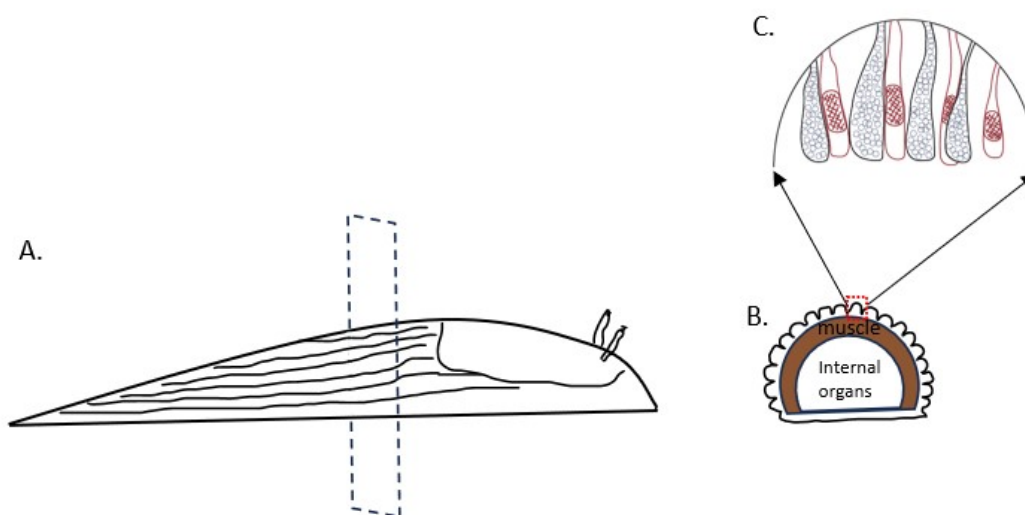

Supplemental Fig. 1. Schematic diagram showing an overview of the slug body wall and secretory epithelium. A) The dashed box shows the plane of section used. B) Transverse section of the body wall showing the heavily folded dorso-lateral epithelium. C) Expanded view of one of the integumentary folds showing glands As1d (blue) and As5d (red).

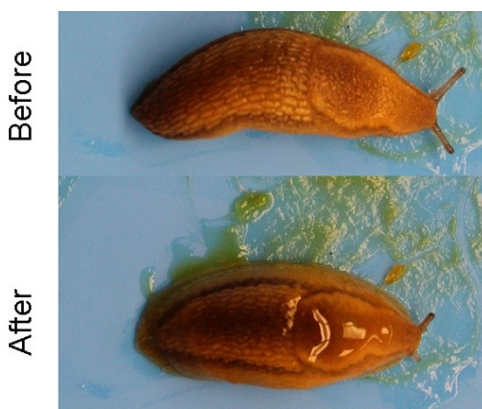

Supplemental Fig. 2. Color change of the slug *A. subfuscus* after stimulation. The same slug is shown undisturbed (top) and after being physically stimulated with a thin metal spatula (bottom). The orange material on the background is glue secreted by previous slugs.

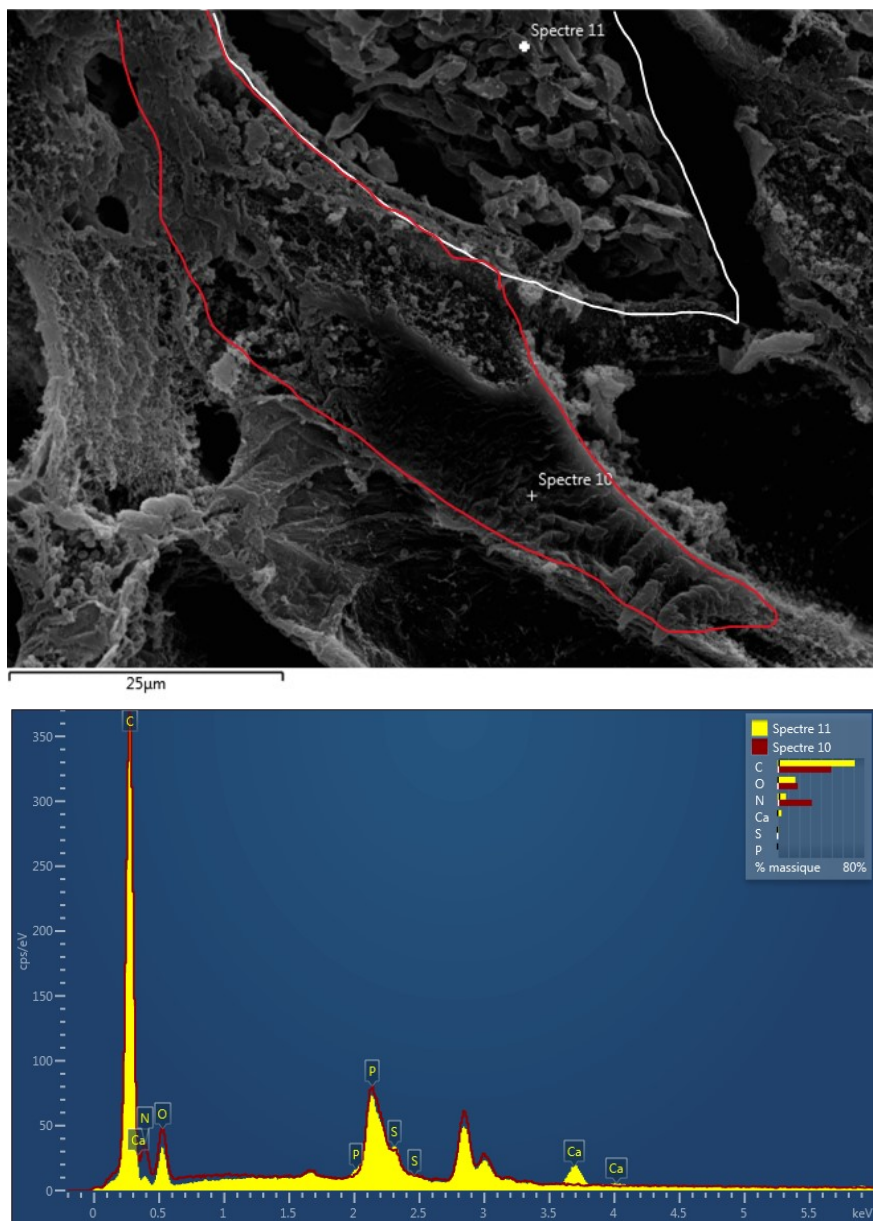

Supplemental Fig. 3. EDS spectra of As1d (Spectre 11, outlined in white) and As5d (Spectre 10, outlined in red). The top image shows the original SEM and the bottom shows the EDS output.

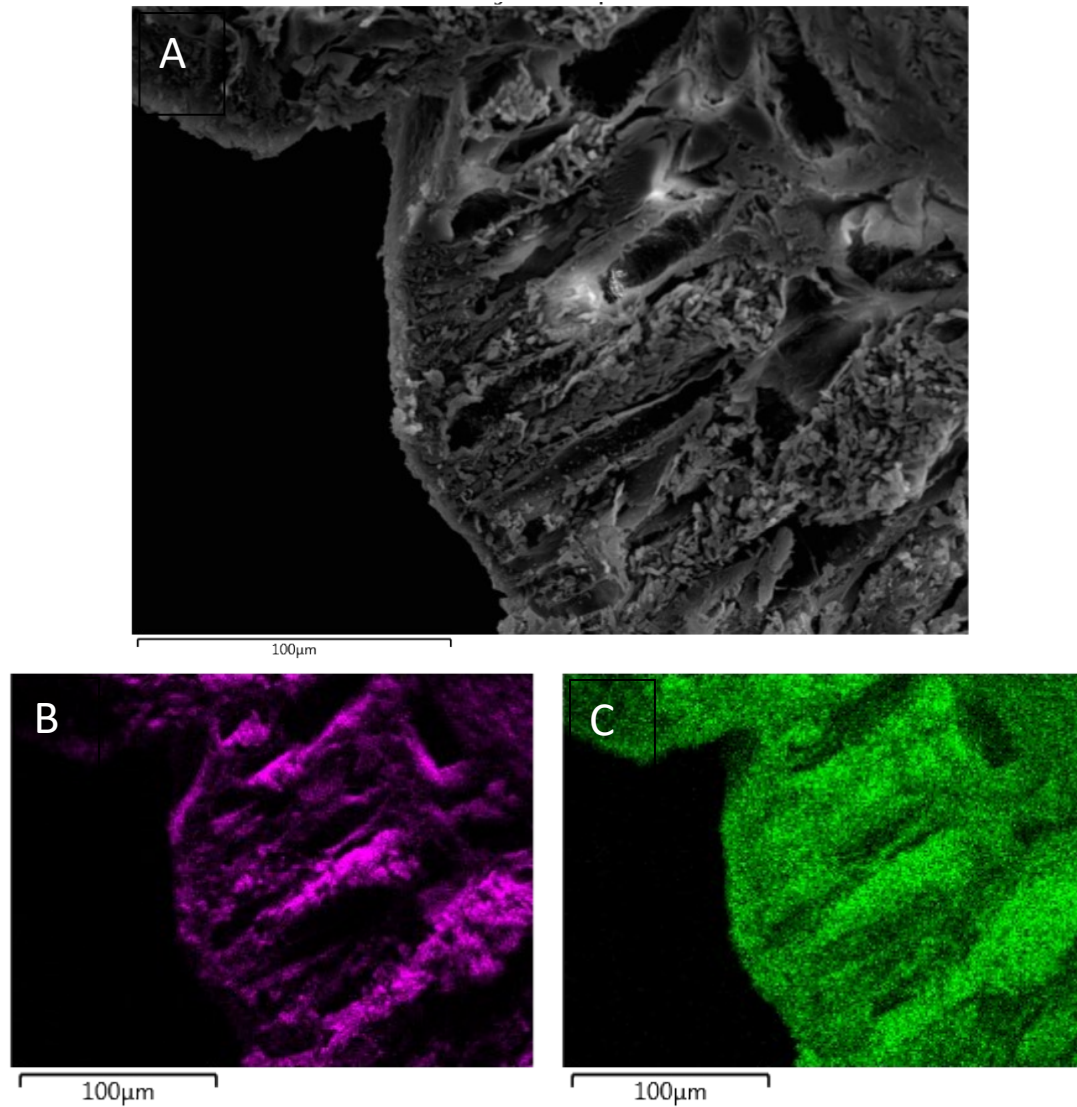

Supplemental Fig. 4. EDS maps showing the oxygen and sulfur signals. A) Standard SEM showing the overall orientation of one epithelial fold with the epithelium to the left. As1d is visible as several large glands containing many small ( $<5\mu\text{m}$ ) packets. B) Oxygen distribution in the section shown in A. The oxygen signal highlights As1d. C) Sulfur distribution in the section shown in A.
