# Supplementary material for: Analysis of the adhesive secreting cells of Arion subfuscus: insights into the role of microgels in a tough, fast-setting hydrogel glue
Source: Royal Society of Chemistry journal article supplement (doi:10.1039/d4sm00071d), 2024-01-01
Supplement: d4sm00071d4.pdf [file d4sm00071d4.pdf]

| Pre-treatment with hydrogen peroxide | Test hydrogen peroxide concentration | Catalase activity in dorsal and lateral epithelium | Catalase activity in muscle of the body wall and pedal sole epithelium |
|--------------------------------------|--------------------------------------|----------------------------------------------------|------------------------------------------------------------------------|
| --                                   | 10 mM                                | Extremely high                                     | Could not distinguish due to excessive bubbles from dorsal/lateral     |
| --                                   | 2 mM                                 | High                                               | Minimal                                                                |
| 2 mM                                 | 10 mM                                | High                                               | None detected                                                          |

Supplemental Table 2. Results of the catalase test. Different concentrations of hydrogen peroxide were washed over previously frozen tissue sections and catalase activity was observed as bubble formation. "Extremely high" activity is defined as immediate formation of large bubbles completely obscuring the structure. "High" activity is rapid and continuous formation of bubbles throughout the structure. "Minimal" activity is occasional production of a few bubbles in the entire region in question. Note that the catalase test typically uses a concentration of 1000 mM.
