# Supplementary material for: Analysis of the adhesive secreting cells of Arion subfuscus: insights into the role of microgels in a tough, fast-setting hydrogel glue
Source: Royal Society of Chemistry journal article supplement (doi:10.1039/d4sm00071d), 2024-01-01
Supplement: d4sm00071d5.pdf [file d4sm00071d5.pdf]

**Supplemental table 1: Overview of lectin binding specificity according to manufacturer Vector laboratories.**

| <b>Lectin</b>                                         | <b>Acronym</b> | <b>Preferred sugar specificity</b> | <b>Comments</b>                                                                                                                                                        |
|-------------------------------------------------------|----------------|------------------------------------|------------------------------------------------------------------------------------------------------------------------------------------------------------------------|
| Concanavalin A                                        | Con A          | $\alpha$ Man, $\alpha$ Glc         | Recognizes $\alpha$ -linked mannose present as part of a core oligosaccharide in many serum and membrane glycoproteins                                                 |
| Jacalin                                               | Jacalin        | Gal $\beta$ 3GalNAc                | Binds also in the presence of conjugated sialic acid.                                                                                                                  |
| Wheat germ agglutinin                                 | WGA            | GlcNAc                             | Preferable binds to dimer and trimers of GlcNAc. Can also bind terminal GlcNAc and chitobiose.                                                                         |
| <i>Datura Stramonium</i> lectin                       | DSL            | (GlcNAc) <sub>2-4</sub>            | Preferable binds to chitobiose or chitotriose over single GlcNAc residues.                                                                                             |
| Peanut agglutinin                                     | PNA            | Gal $\beta$ 3GalNAc                | Does not bind in the presence of conjugated sialic acid.                                                                                                               |
| Soybean agglutinin                                    | SBA            | $\alpha$ > $\beta$ GalNAc          | Binds to oligosaccharide structures with terminal $\alpha$ - or $\beta$ -linked <i>N</i> -acetylgalactosamine, and to a lesser extent, galactose residues.             |
| <i>Vicia villosa</i> lectin                           | VVL            | GalNAc                             | Recognizes preferentially $\alpha$ - or $\beta$ -linked terminal GalNAc, especially a single GalNAc residue linked to serine or threonine in a polypeptide.            |
| <i>Lens culinaris</i> agglutinin                      | LCA            | $\alpha$ Man, $\alpha$ Glc         | Recognizes sequences containing $\alpha$ Man residues but recognizes additional sugars as part of the receptor structure, giving it a narrower specificity than Con A. |
| <i>Ricinus communis</i> agglutinin                    | RCA I          | Gal, GalNAc                        | Binds to Gal or GalNAc residues of membrane glycoconjugates.                                                                                                           |
| <i>Griffonia (Bandeiraea) simplicifolia</i> lectin II | GSL II         | $\alpha$ or $\beta$ GlcNAc         | Is unique in its ability to recognize exclusively $\alpha$ - or $\beta$ -linked GlcNAc residues on the nonreducing terminal of oligosaccharides.                       |
| <i>Lycopersicon esculentum</i> (tomato) lectin        | LEL            | (GlcNAc) <sub>2-4</sub>            | Binds strongly to poly lactosamine oligosaccharides.                                                                                                                   |
| <i>Ulex europaeus</i> agglutinin 1                    | UEA 1          | L-Fuc                              | Binds to many glycoproteins and glycolipids containing $\alpha$ -linked fucose residues.                                                                               |
| <i>Dolichos biflorus</i> agglutinin                   | DBA            | $\alpha$ GalNAc                    | Has a carbohydrate specificity toward $\alpha$ -linked <i>N</i> -acetylgalactosamine.                                                                                  |
| <i>Erythrina cristagalli</i> lectin                   | ECL            | Gal $\beta$ 4GlcNAc                | Sialic acid substitution appears to prevent the lectin from binding.                                                                                                   |
| <i>Solanum tuberosum</i> (potato) lectin              | STL            | (GlcNAc) <sub>2-4</sub>            | Binds oligomers of GlcNAc and some bacterial cell wall oligosaccharides containing GlcNAc and <i>N</i> -acetylmuramic acid.                                            |

**Sugar Abbreviations:**

|        |                                               |
|--------|-----------------------------------------------|
| Fuc    | L-Fucose                                      |
| Gal    | D-Galactose                                   |
| GalNAc | <i>N</i> -Acetylgalactosamine                 |
| Glc    | D-Glucose                                     |
| GlcNAc | <i>N</i> -Acetylglucosamine                   |
| Man    | Mannose                                       |
| Neu5Ac | <i>N</i> -Acetylneuraminic acid (sialic acid) |
